# Supplementary material
Source: publisher site journal article supplement (https://www.dovepress.com/article/265739)
Supplement: Supplementary file 1 [file get_supplementary_file.php]

**Supplementary Data**


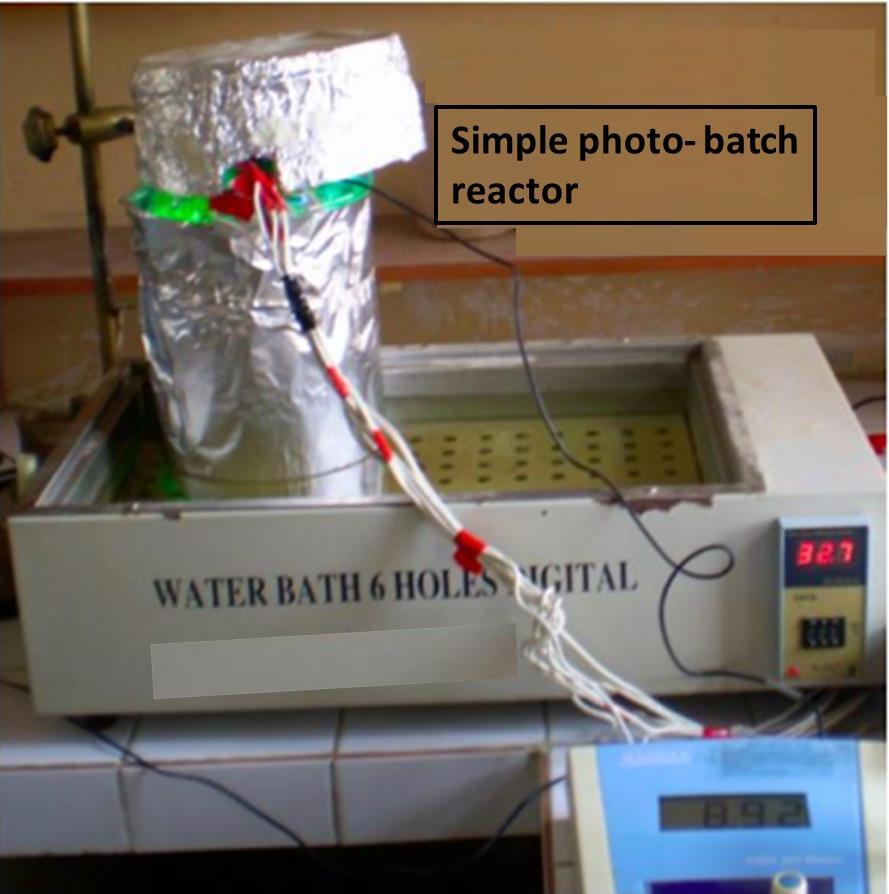


**Figure S1** Simple photo-batch catalytic oxidation reactor.


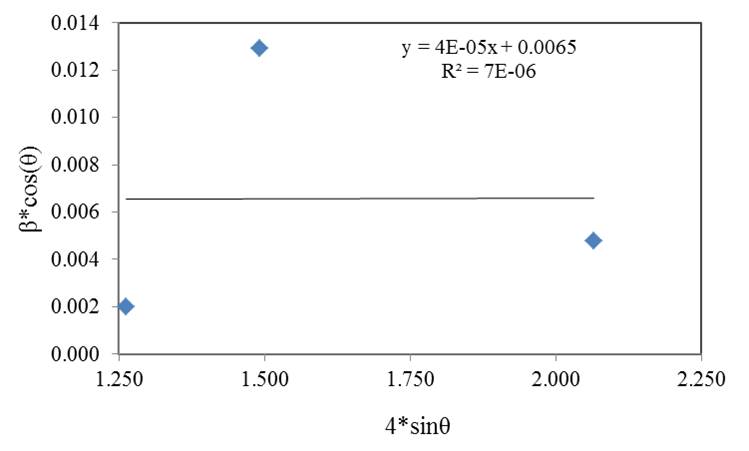


**Figure S2** Williamson-Hall plots for MgO NP.

**Table S1** Parameters obtained for MgO NP from XRD analysis

| Pos. *2θ*  (deg) | *fwhm*  (deg) | *hkl*  *planes* | *β*cos(θ)* | *4*sin(θ)* | *4*tan(θ)* | Williamson-Hall | | Debye-Scherer | |
| --- | --- | --- | --- | --- | --- | --- | --- | --- | --- |
| crystallite size  (nm) | lattice strain | crystallite size  (nm) | lattice strain |
| 36.811 | 0.12079 | 111 | 0.002 | 1.263 | 1.33 | 21.33 | 0.00004 | 69.31 | 0.0016 |
| 43.781 | 0.79776 | 200 | 0.013 | 1.491 | 1.61 | 10.73 | 0.0087 |
| 62.156 | 0.31893 | 220 | 0.005 | 2.065 | 2.41 | 29.08 | 0.0023 |
| Average | | | | | | 21.33 | 0.00004 | 36.38 | 0.0042 |

*2θ (degrees)*: Diffraction angle; *hkl*:The Miller indices define the reciprocal axial intercepts of a plane of atomsand *fwhm*: full width half maximum
